# Supplementary material for: Germline Structural Variations Are Preferential Sites of DNA Replication Timing Plasticity during Development
Source: PubMed Central journal article supplement — Genome Biol Evol. 2019 May 10;11(6):1663–78. doi: 10.1093/gbe/evz098 (PMC6582765; doi:10.1093/gbe/evz098), 2019-05-10

# Supplemental Figure 1

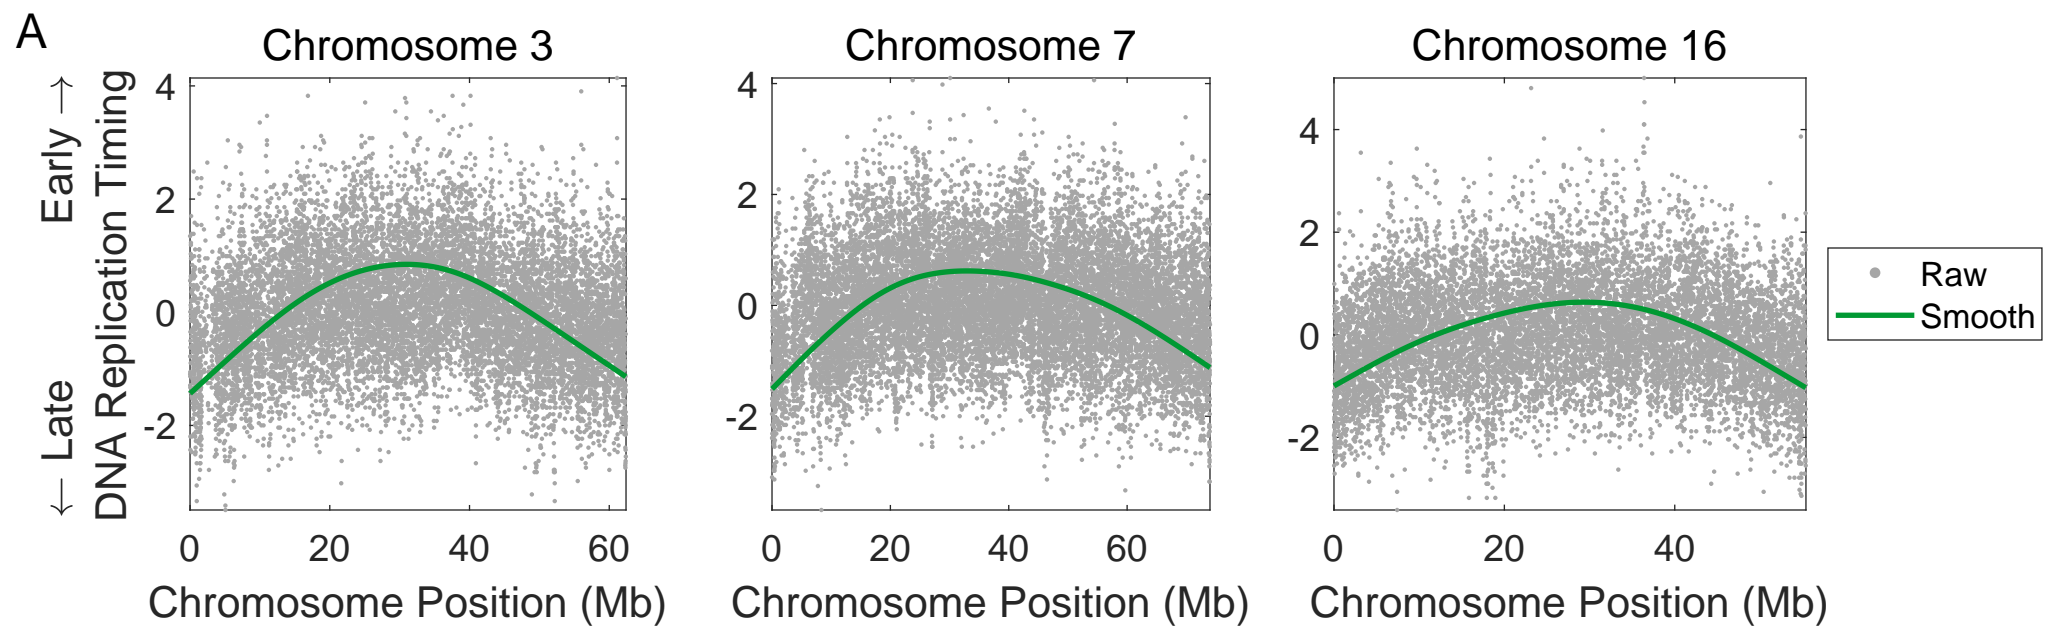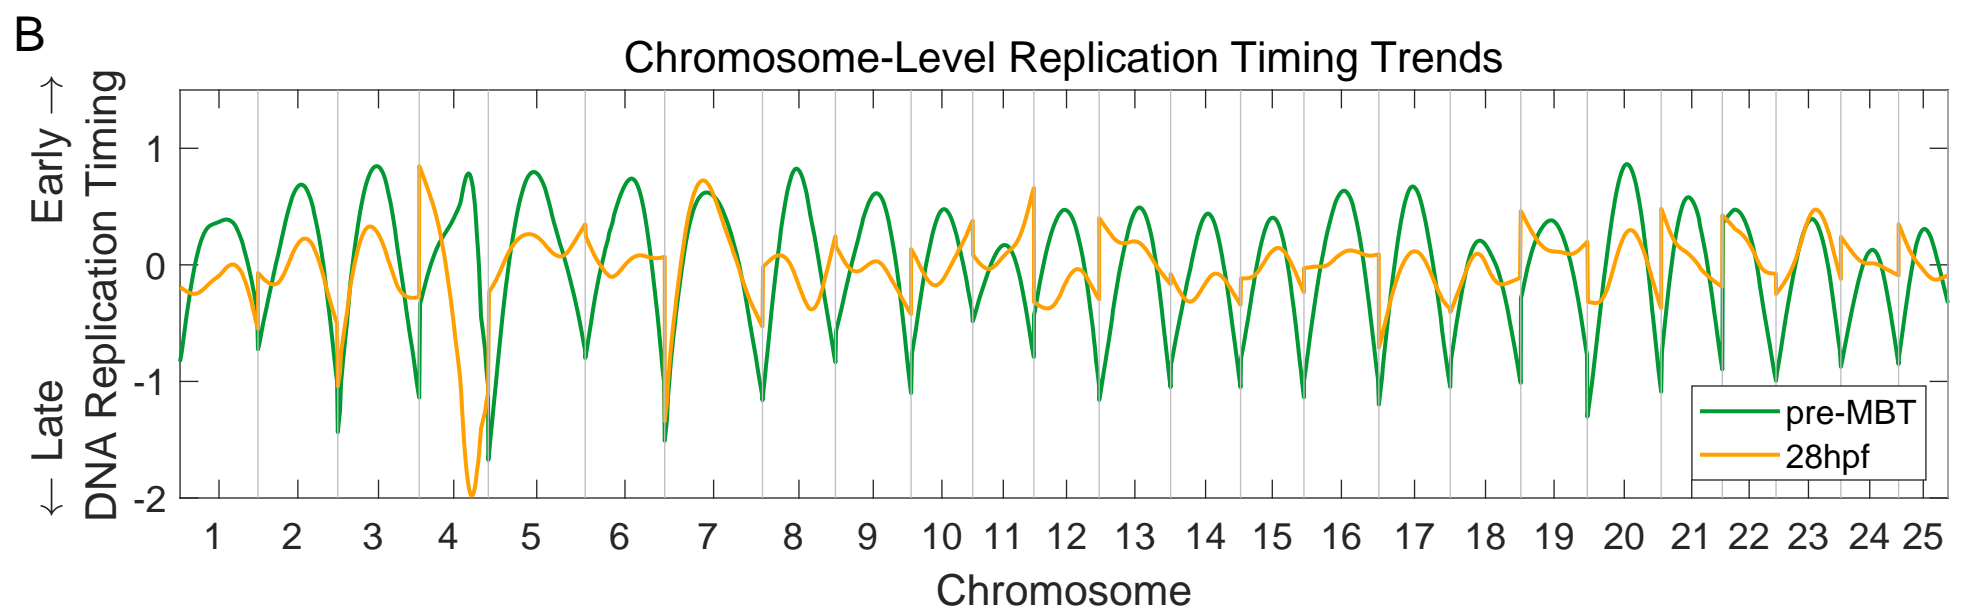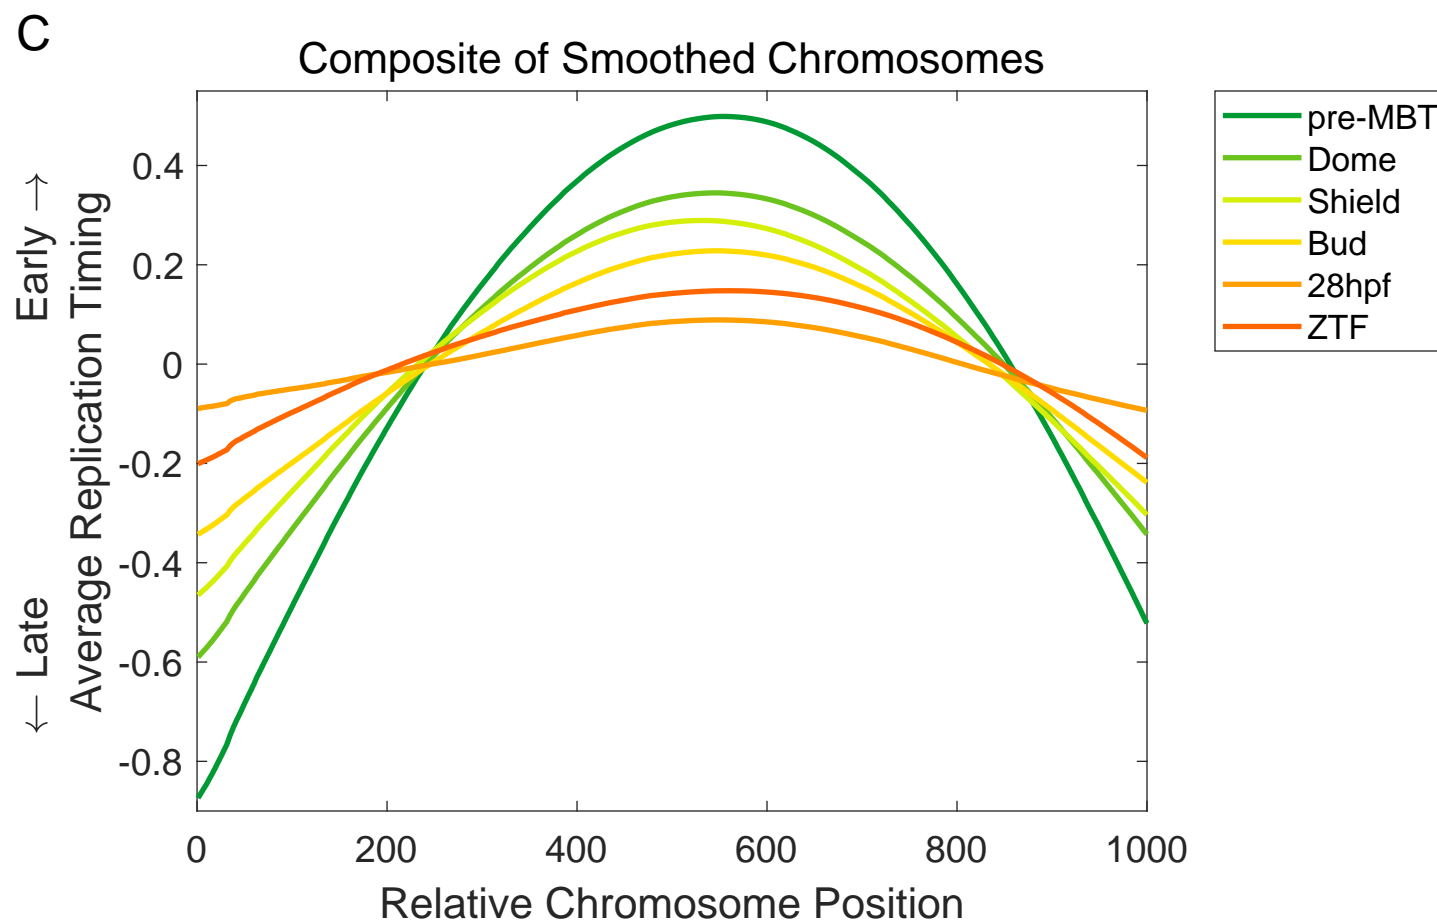

Supplemental Figure 2

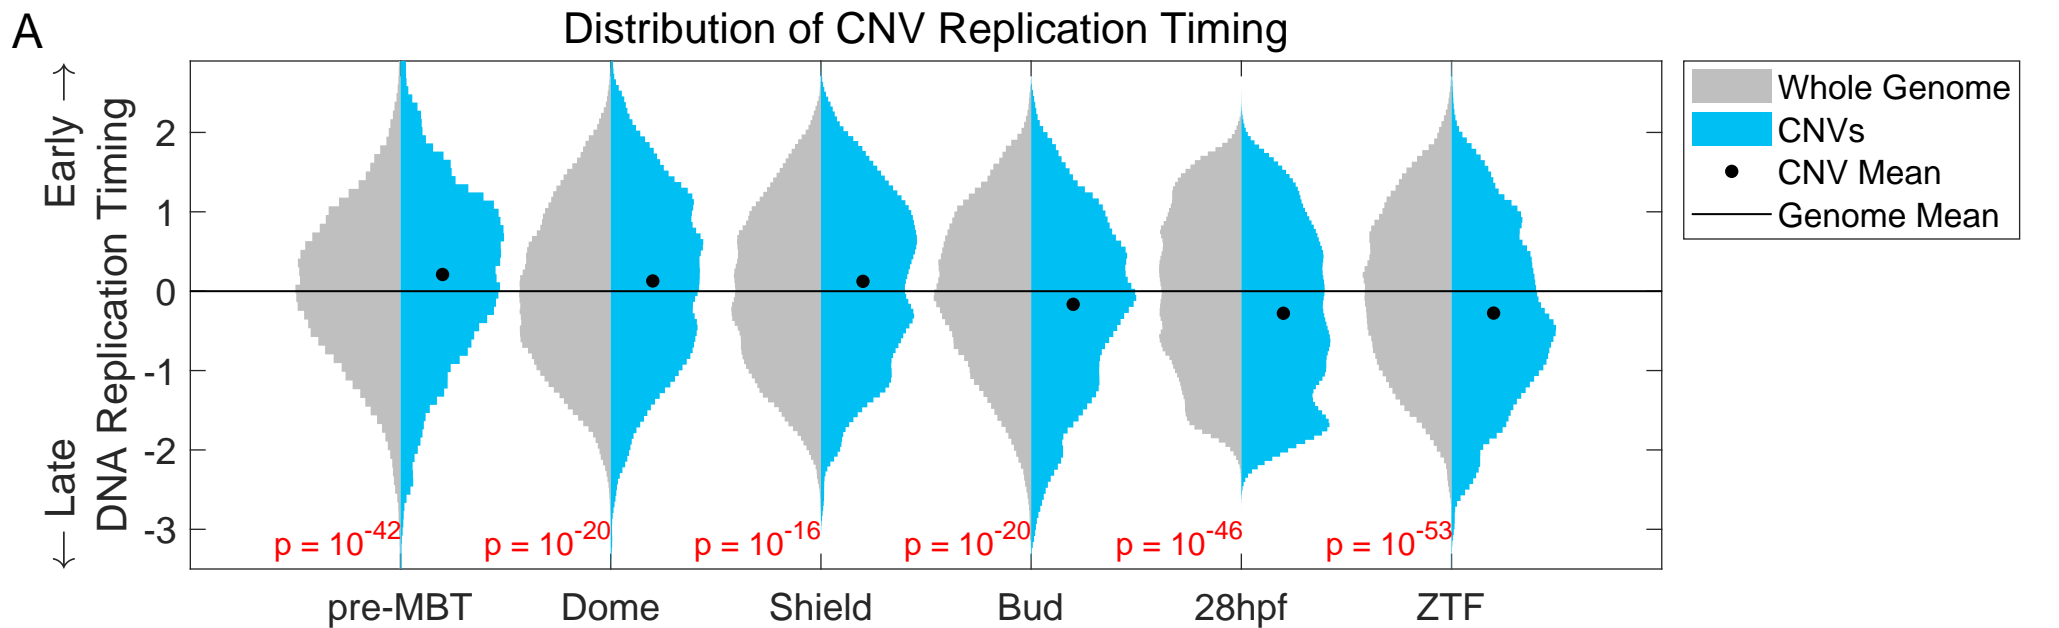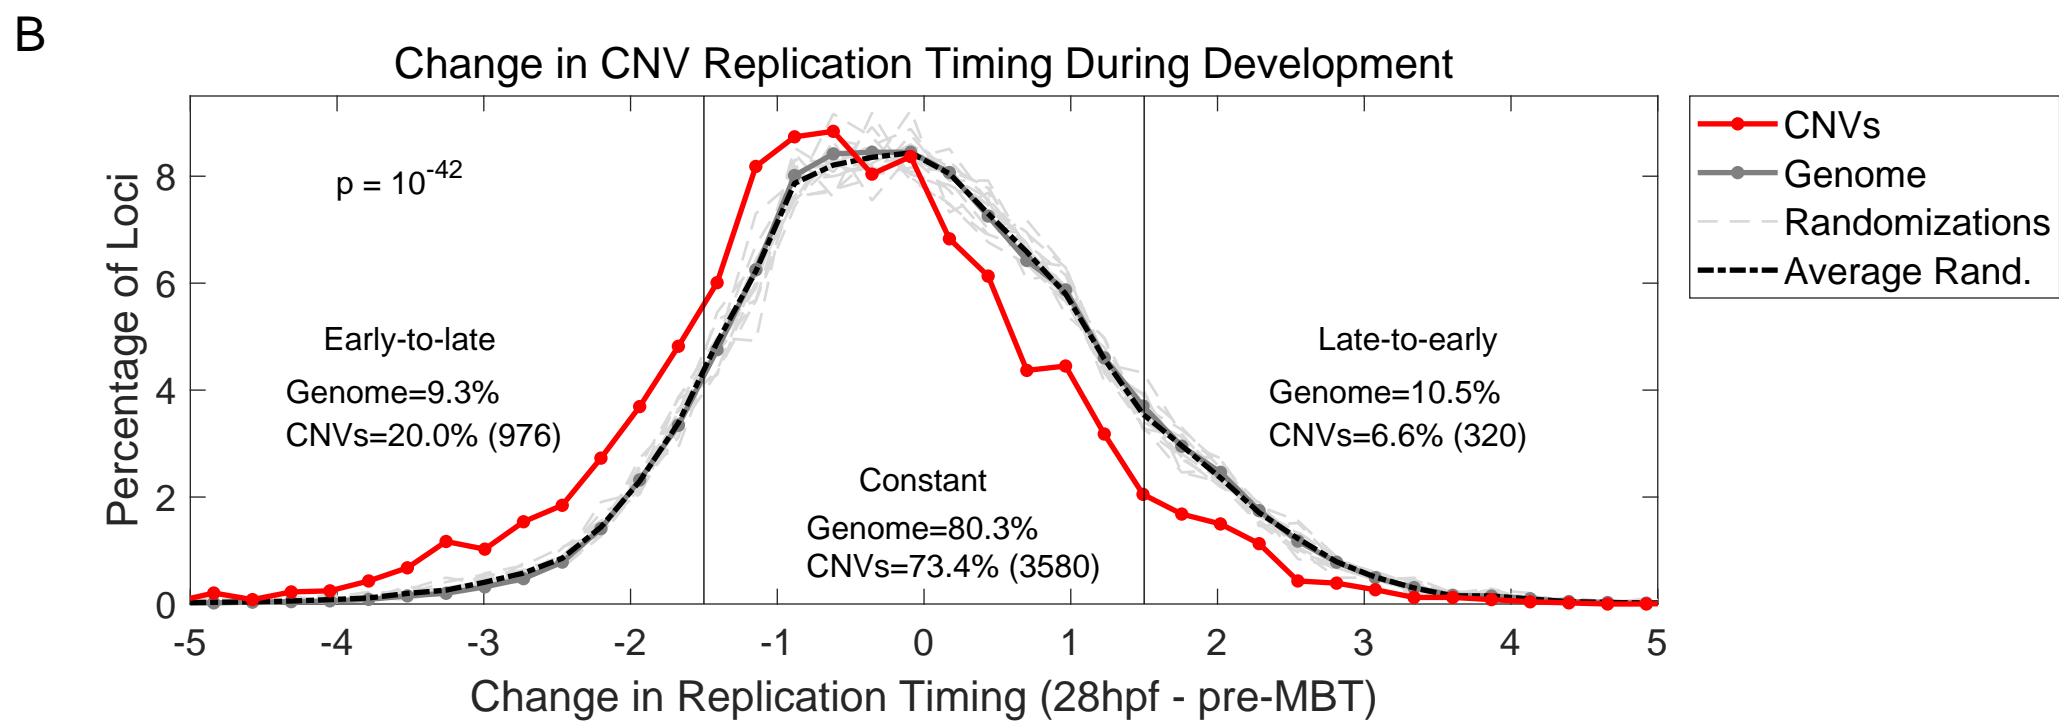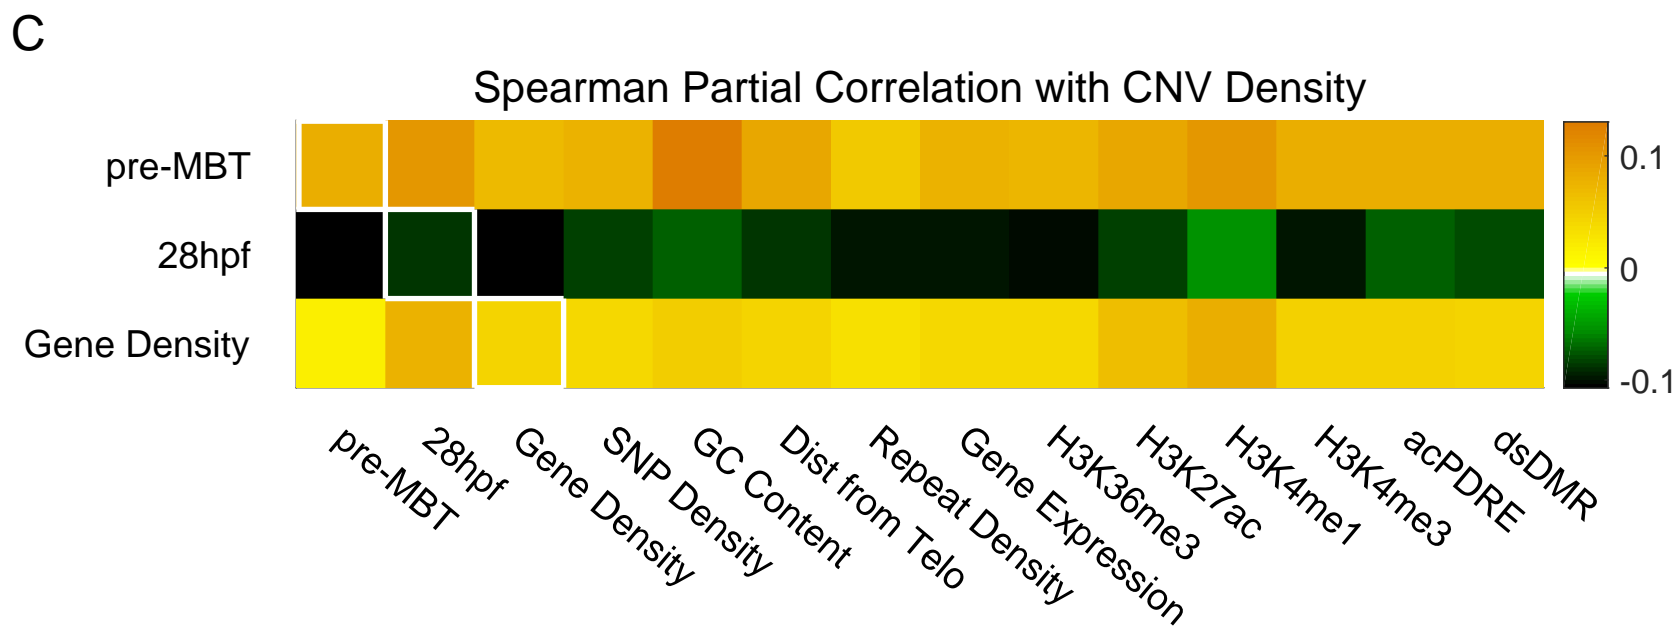

Supplemental Figure 3

Zebrafish  
Chromosome 13

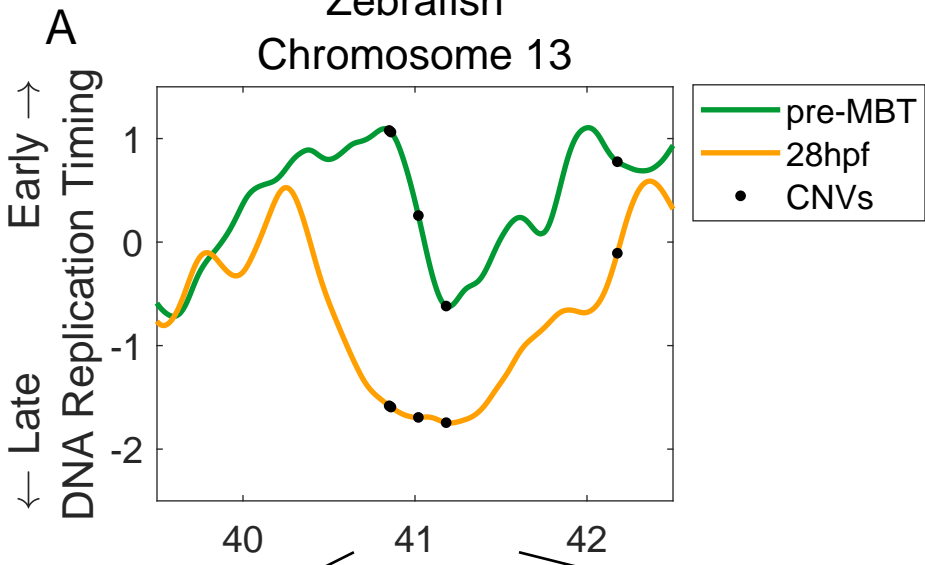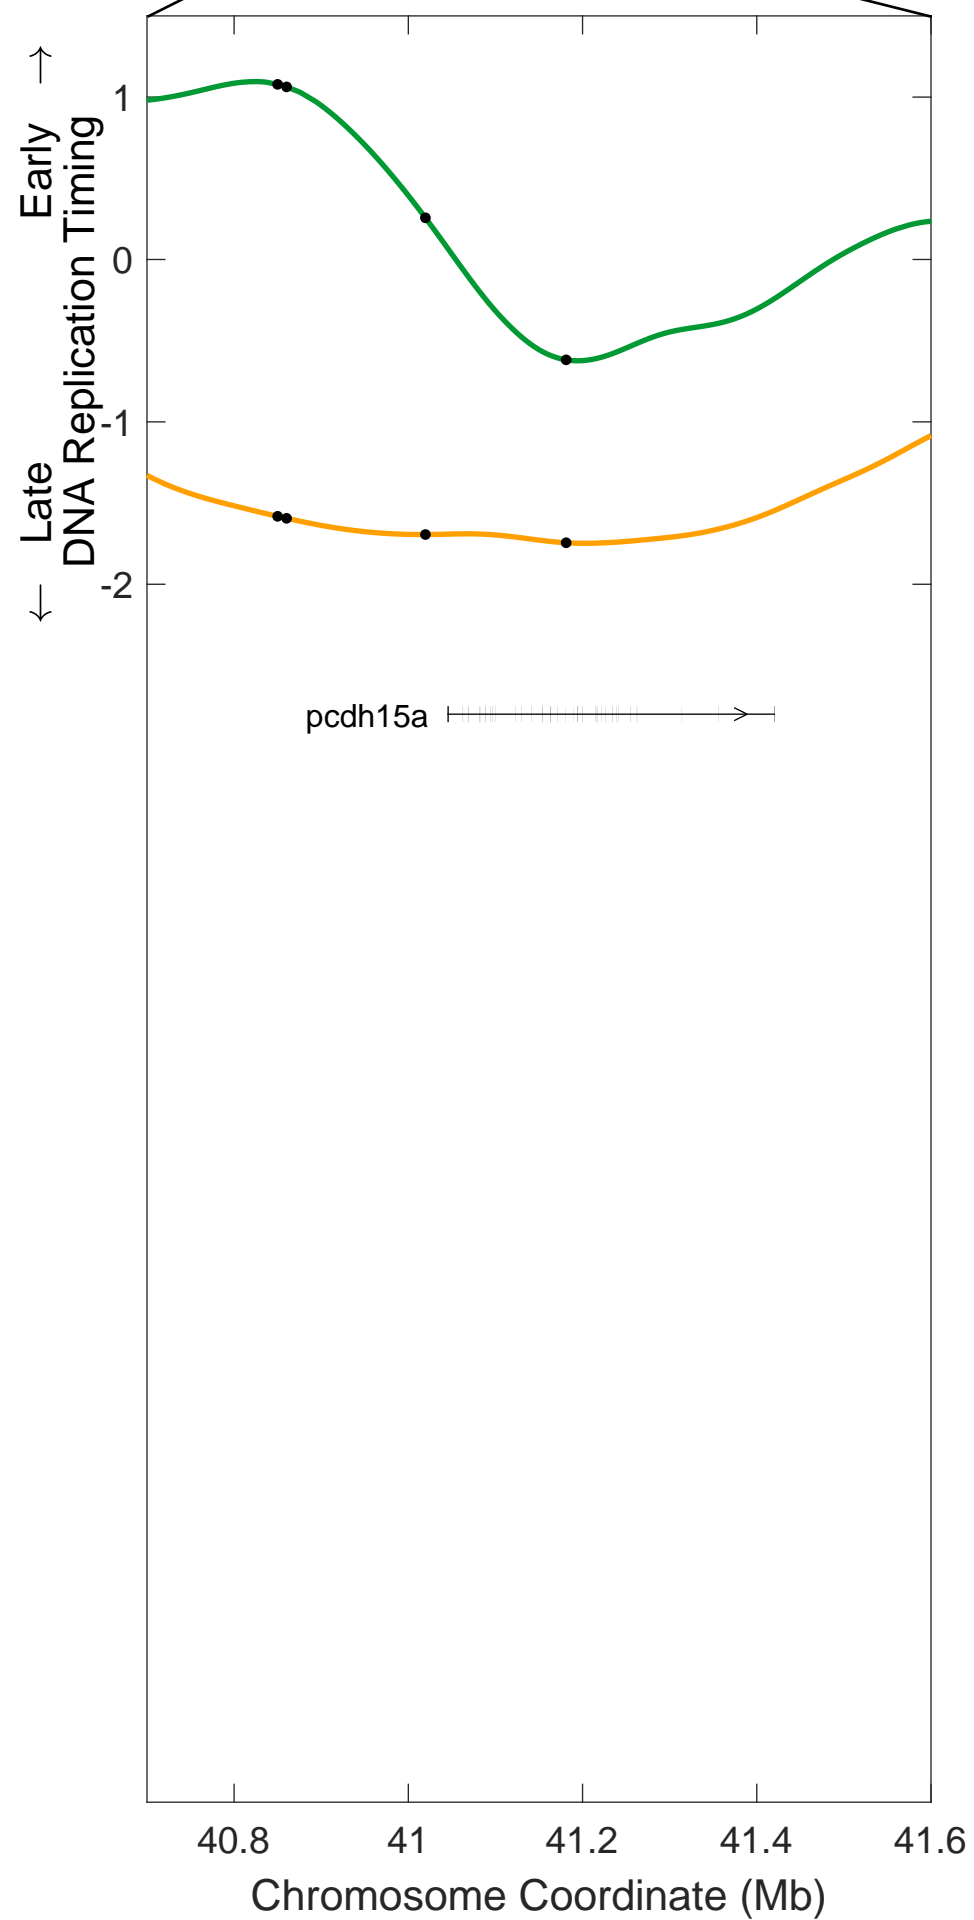

Human  
Chromosome 5

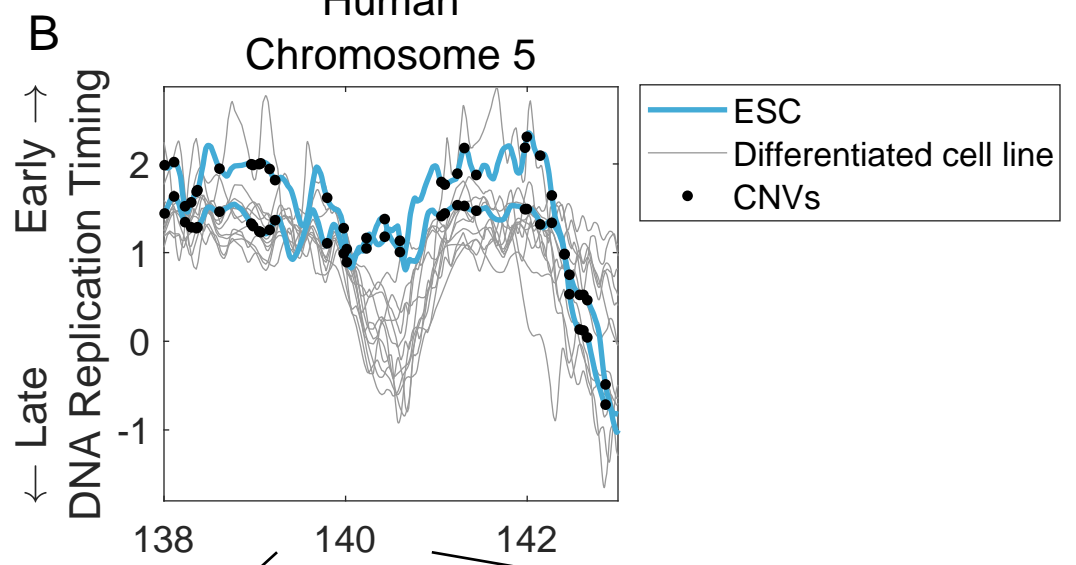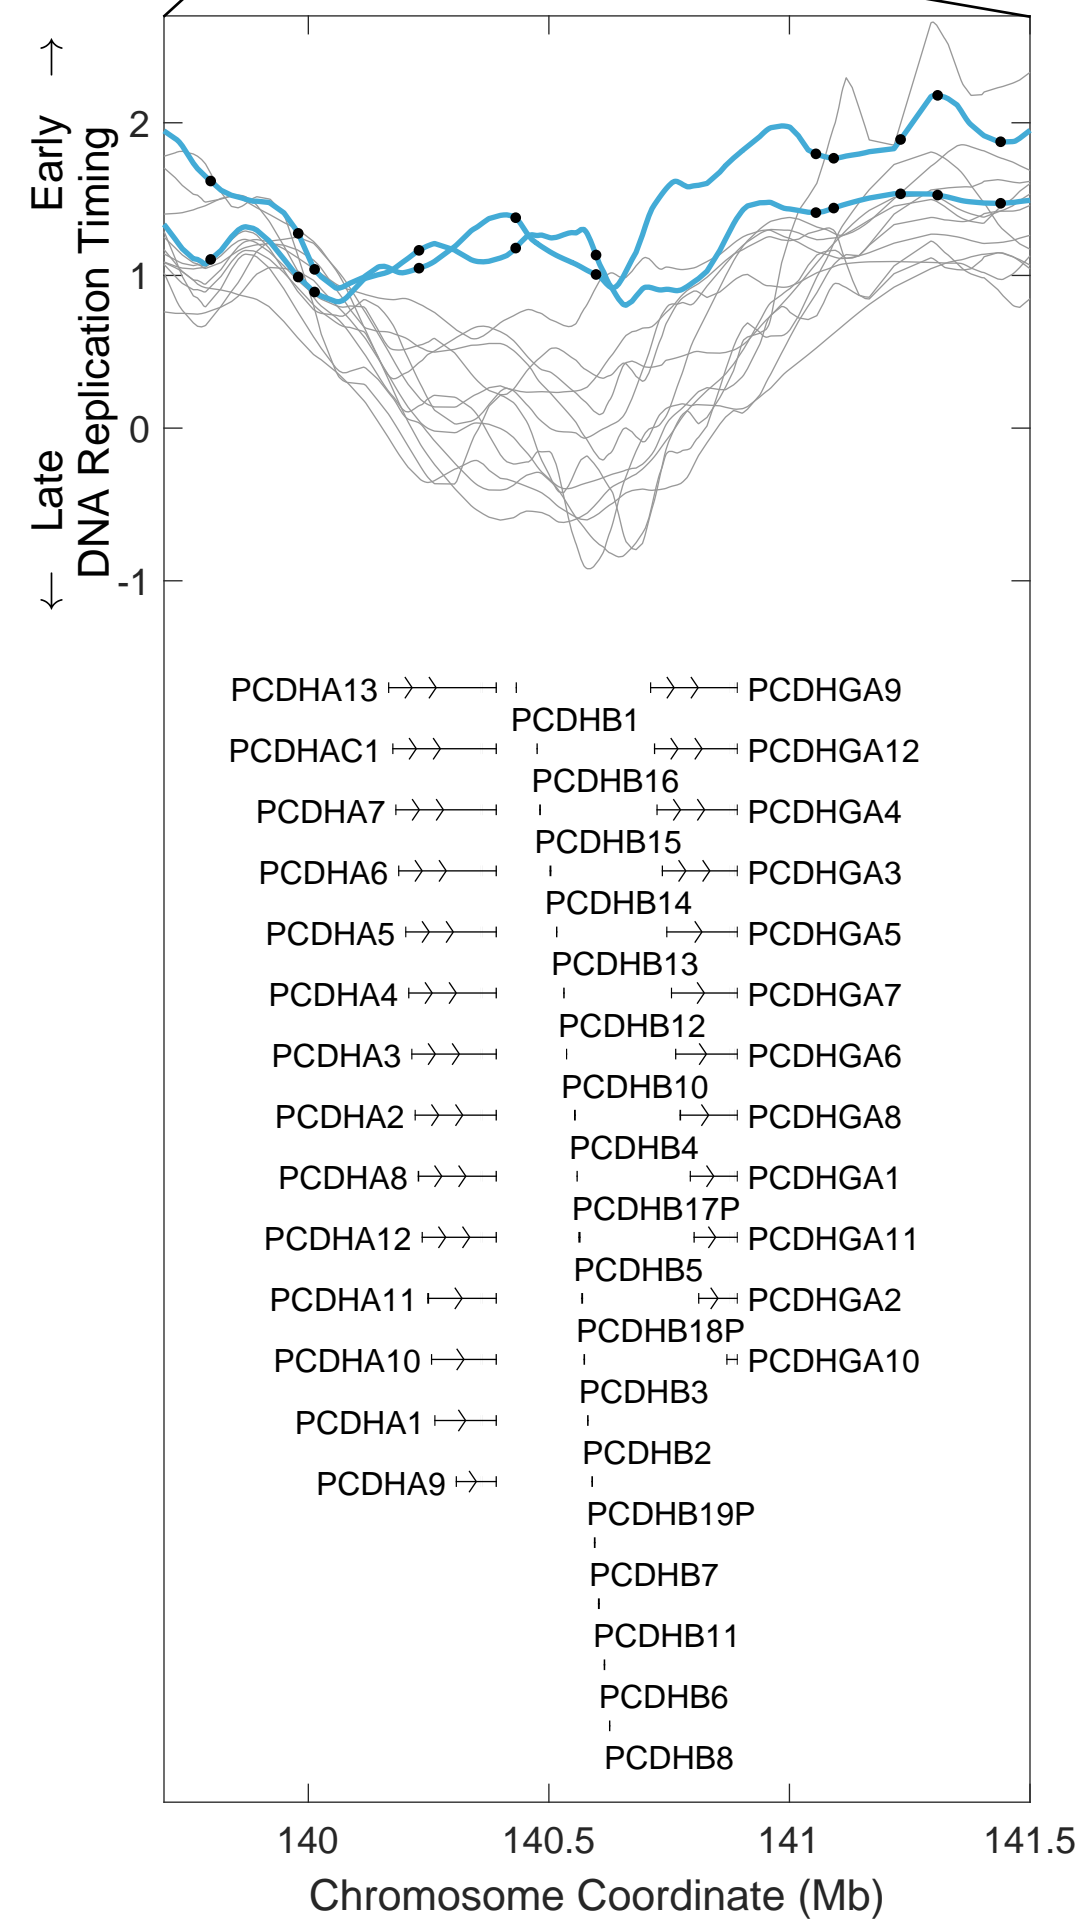

# Supplemental Figure 4

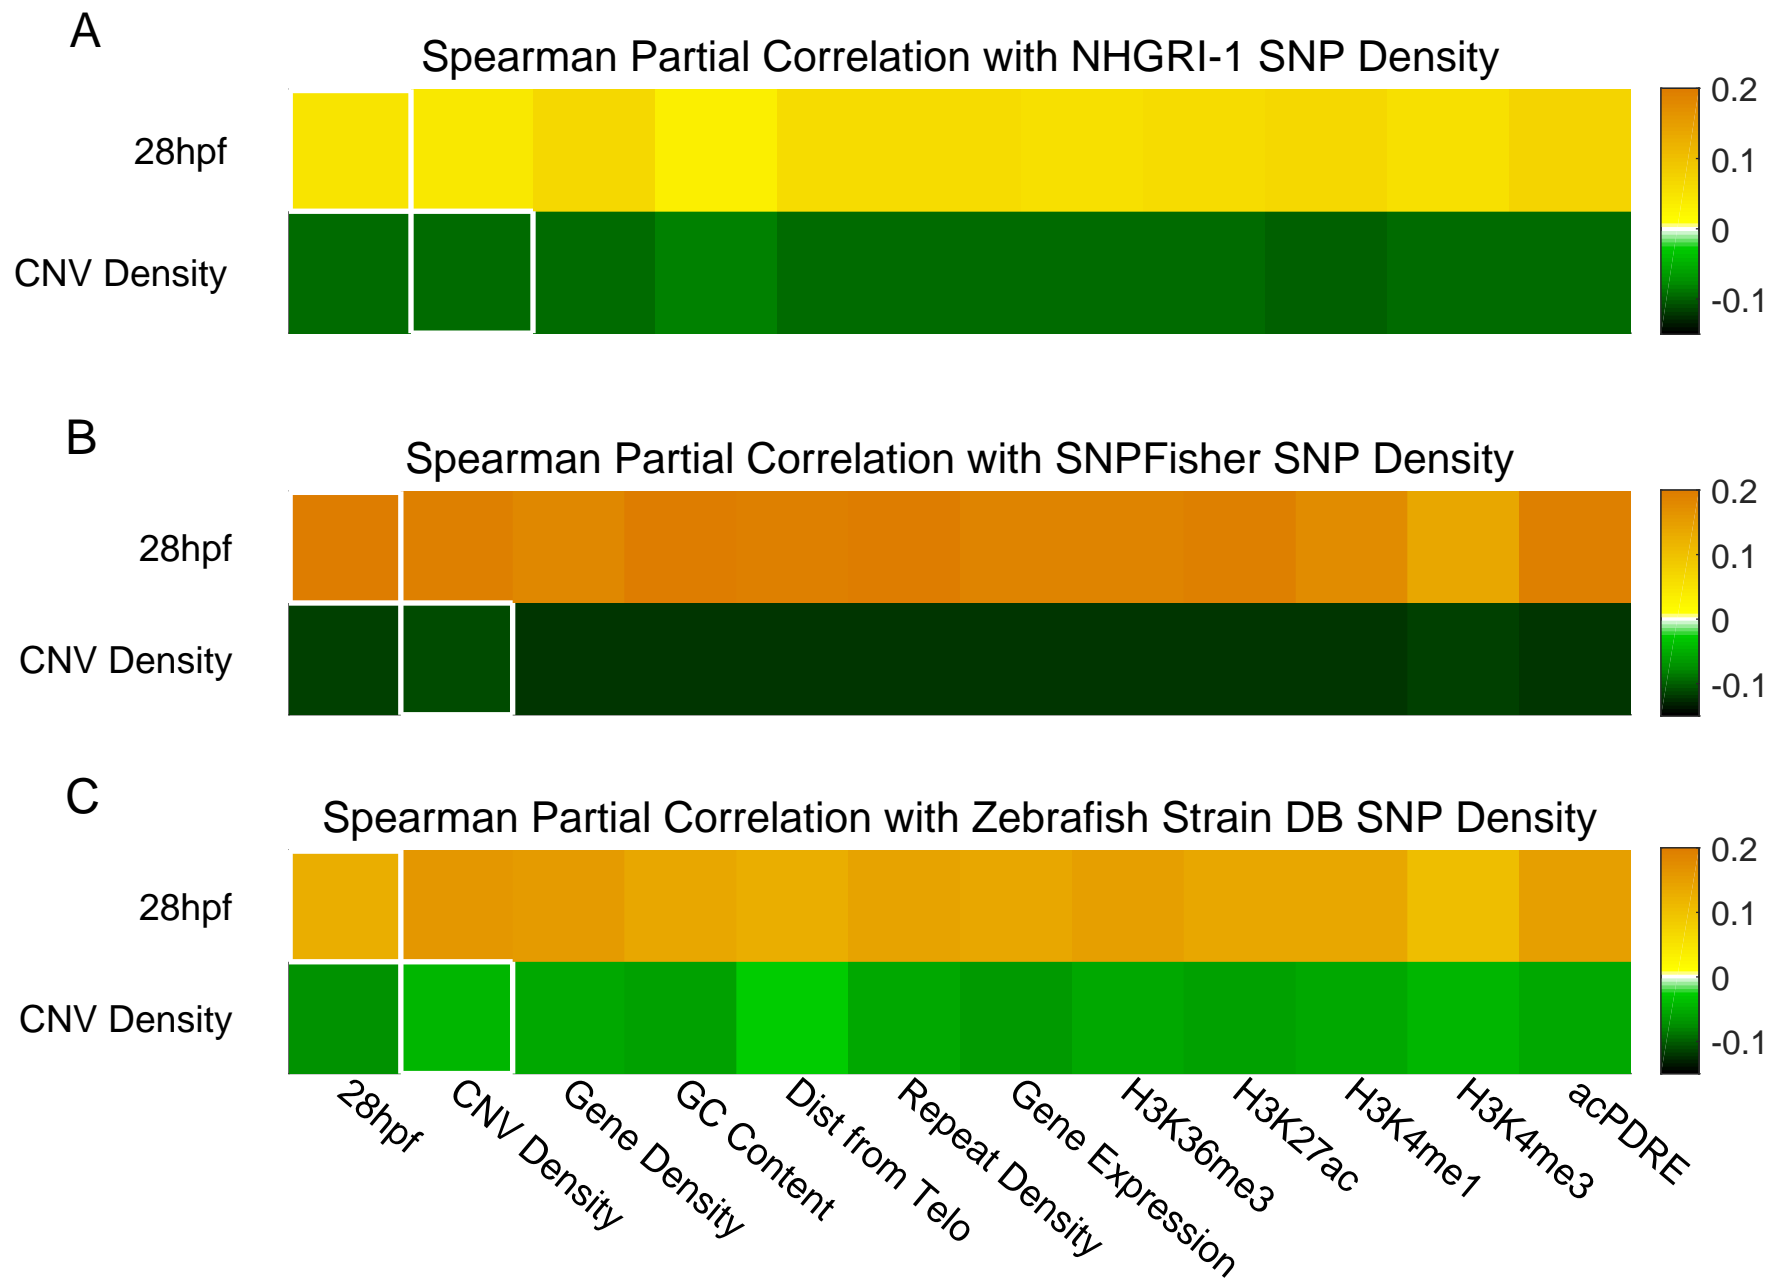

Supplemental Figure 5

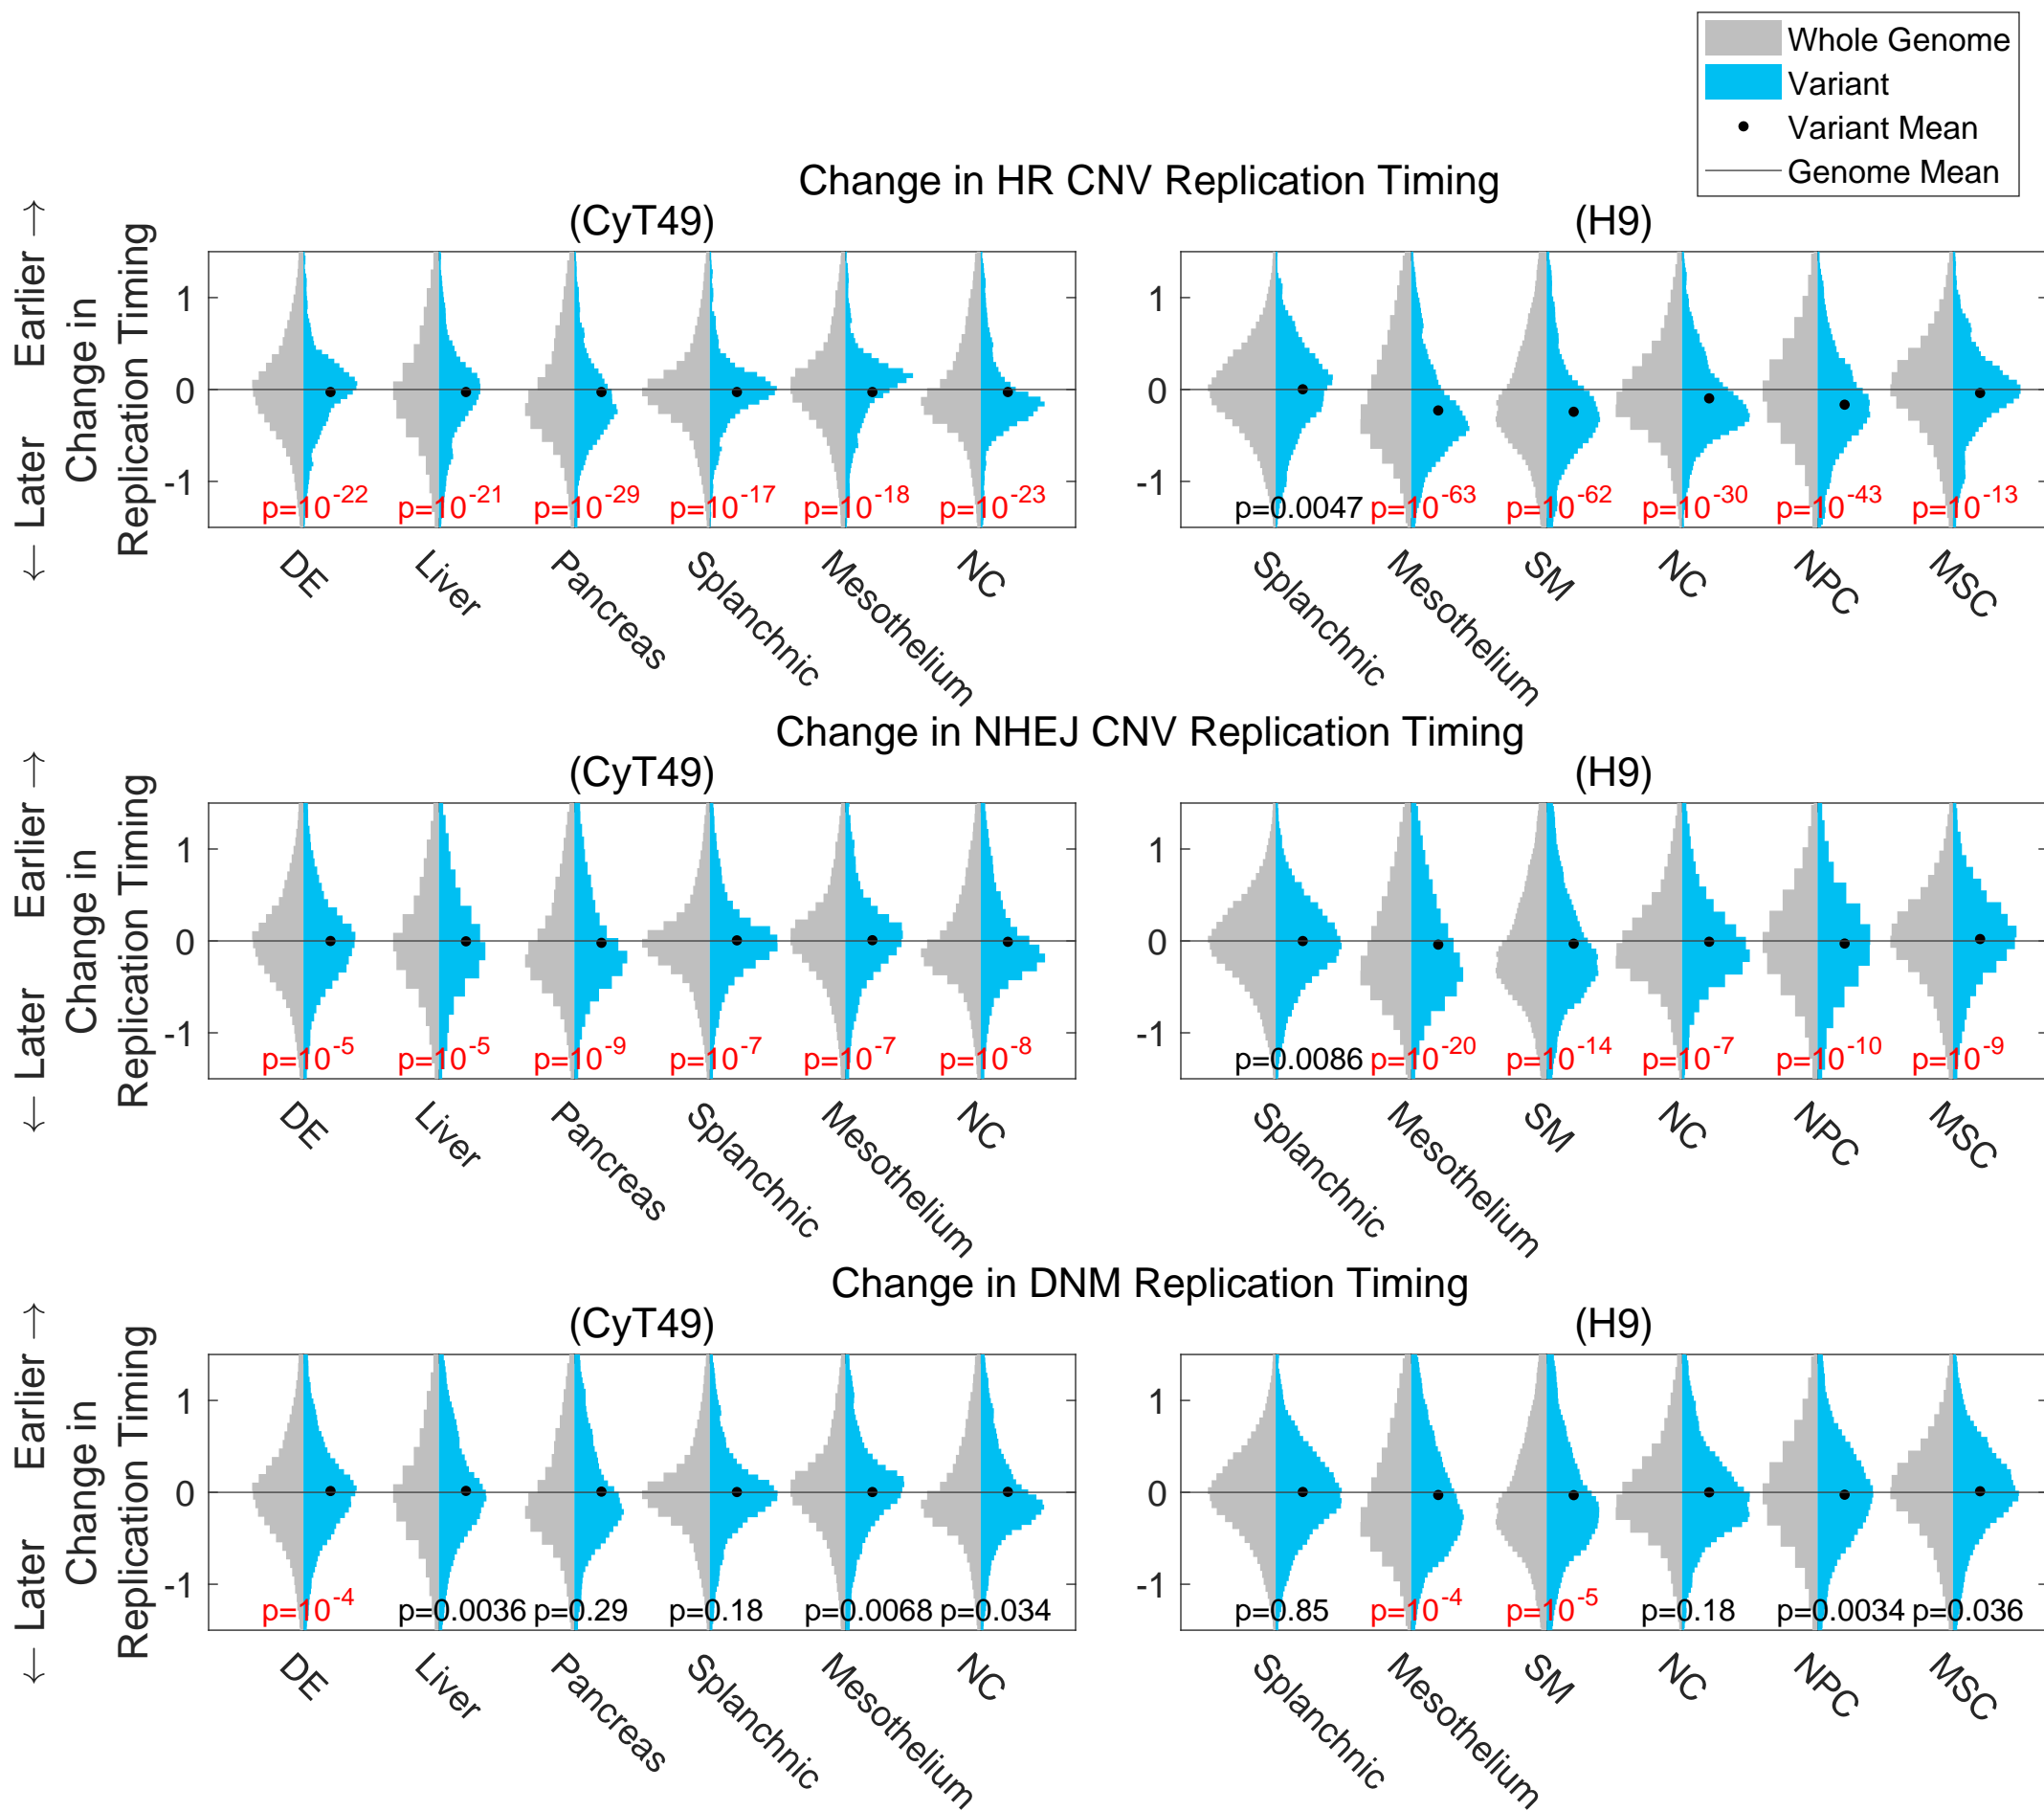

Supplement: supplementary_material_evz098.pdf [file supplementary_material_evz098.pdf]
